# Supplementary material for: Rheological phase reaction synthesis and electrochemical performance of rufigallol anode for lithium ion batteries
Source: PubMed Central journal article supplement — RSC Adv. 2018 May 24;8(34):19272–7. doi: 10.1039/c8ra02610f (PMC9080710; doi:10.1039/c8ra02610f), 2018-05-24
Supplement: RA-008-C8RA02610F-s001.pdf [file RA-008-C8RA02610F-s001.pdf]

## Electronic Supplementary Information

### Rheological phase reaction synthesis and electrochemical performance of rufigallol anode for lithium ion batteries

Xiaoyan Han\*, Guanyu Lin, Qing Zhang and Yingkui Yang

*Key Laboratory of Catalysis and Materials Science of the State Ethnic Affairs Commission & Ministry of Education, Hubei Province, South-Central University for Nationalities, Wuhan 430074, China. \*E-mail: xyhan@scuec.edu.cn.*

Table S1. The most-advanced works summarized for carbonyl metal-organic materials as anodes for lithium ion batteries.

| Materials                                                                                            | Electrode composition (active material /conductive additive/binder) | Stable charge capacity (mAh g <sup>-1</sup> ) /Current density (mA g <sup>-1</sup> ) | Initial capacity (mAh g <sup>-1</sup> ) /Current density (mA g <sup>-1</sup> ) | *Reference /year |
|------------------------------------------------------------------------------------------------------|---------------------------------------------------------------------|--------------------------------------------------------------------------------------|--------------------------------------------------------------------------------|------------------|
| Lithium Perylenetetracarboxylates (Li <sub>4</sub> C <sub>24</sub> H <sub>8</sub> O <sub>8</sub> )   | 70:20:10                                                            | 195 (25)<br>170 (50)<br>110 (400)                                                    | 470 and 200 (25)                                                               | [1]/2013         |
| Silver terephthalate (Ag <sub>2</sub> C <sub>8</sub> H <sub>4</sub> O <sub>4</sub> )                 | 60:30:10                                                            | 171 (71)<br>161 (140)<br>122 (564)                                                   | 650 and 210 (14)                                                               | [2]/2016         |
| Zinc terephthalates (ZnC <sub>8</sub> H <sub>4</sub> O <sub>4</sub> )                                | 60:30:10                                                            | 330 (118)                                                                            | 626 and 237 (118)                                                              | [3]/2017         |
| Aluminum fumarates (AlCl <sub>3</sub> -FumA)                                                         | 50:40:10                                                            | 392 (37.5)                                                                           | 899 and 401 (37.5)                                                             | [4]/2017         |
| Metal formates (Zn <sub>3</sub> (HCOO) <sub>6</sub> )                                                | 70:15:15                                                            | 550 (60)                                                                             | 1344 and 693 (60)                                                              | [5]/2010         |
| Nickel naphthalenetetracarboxylates (Ni <sub>2</sub> C <sub>14</sub> H <sub>4</sub> O <sub>8</sub> ) | 60:30:10                                                            | 500 (100)                                                                            | 1823 and 982 (100)                                                             | [6]/2012         |
| Lithium perylenetetracarboxylates (Li <sub>4</sub> C <sub>24</sub> H <sub>8</sub> O <sub>8</sub> )   | 55:35:10                                                            | 120 (24)<br>90 (240)                                                                 | 210 and 130 (24)                                                               | [7]/2015         |
| Rufigallol-Li/Ni (Li <sub>4</sub> NiC <sub>14</sub> H <sub>2</sub> O <sub>8</sub> )                  | 60:35:5                                                             | 530 (100)<br>420 (200)<br>300 (500)                                                  | 1214 and 560 (100)                                                             | This work        |

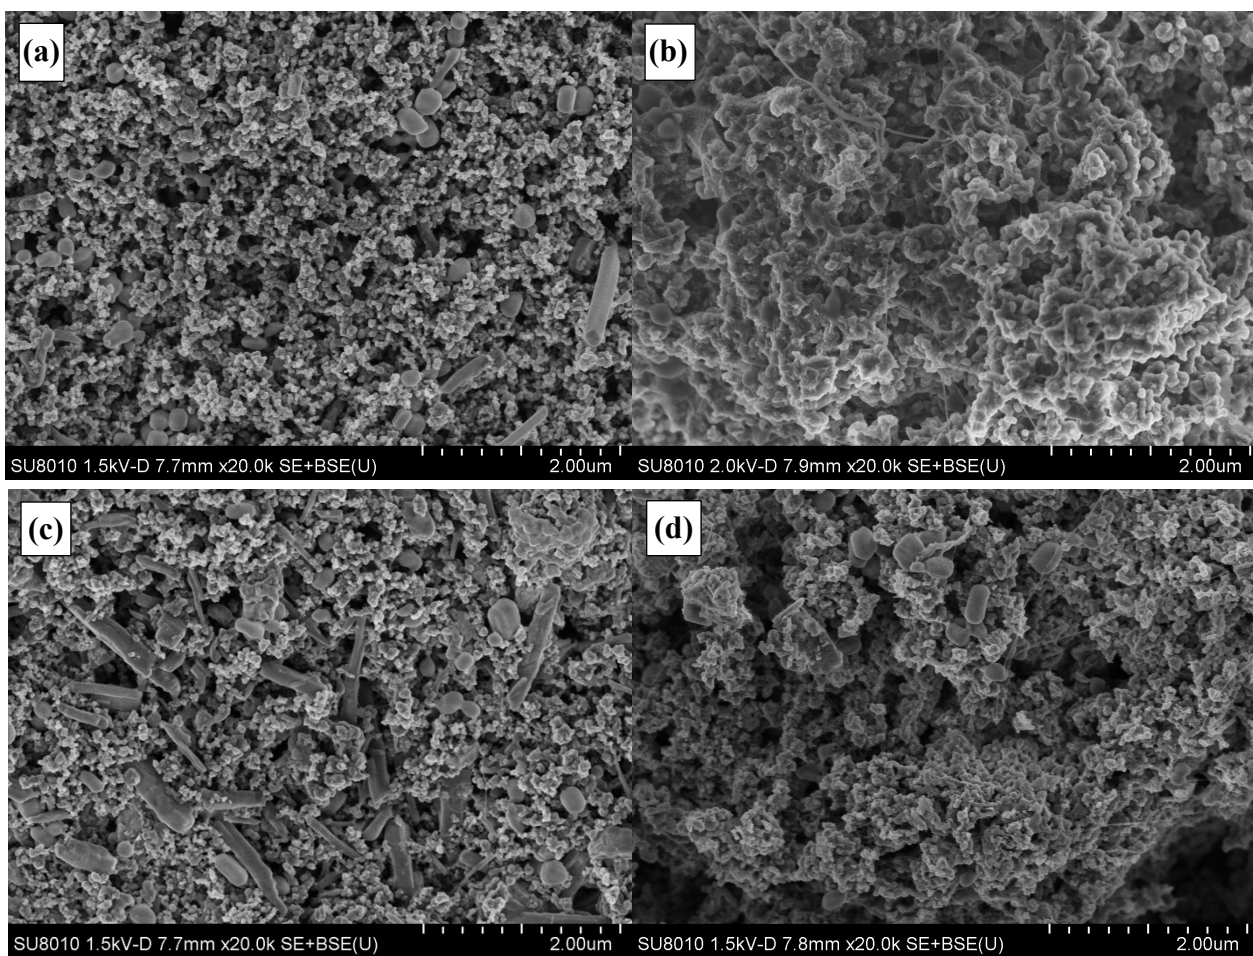

Figure S1. SEM images of fresh electrode (a) and the retrieved electrode (b) after 200 cycles at  $500 \text{ mA g}^{-1}$  of rufigallol; SEM images of fresh electrode (c) and the retrieved electrode (d) after 200 cycles at  $500 \text{ mA g}^{-1}$  of R-LN.

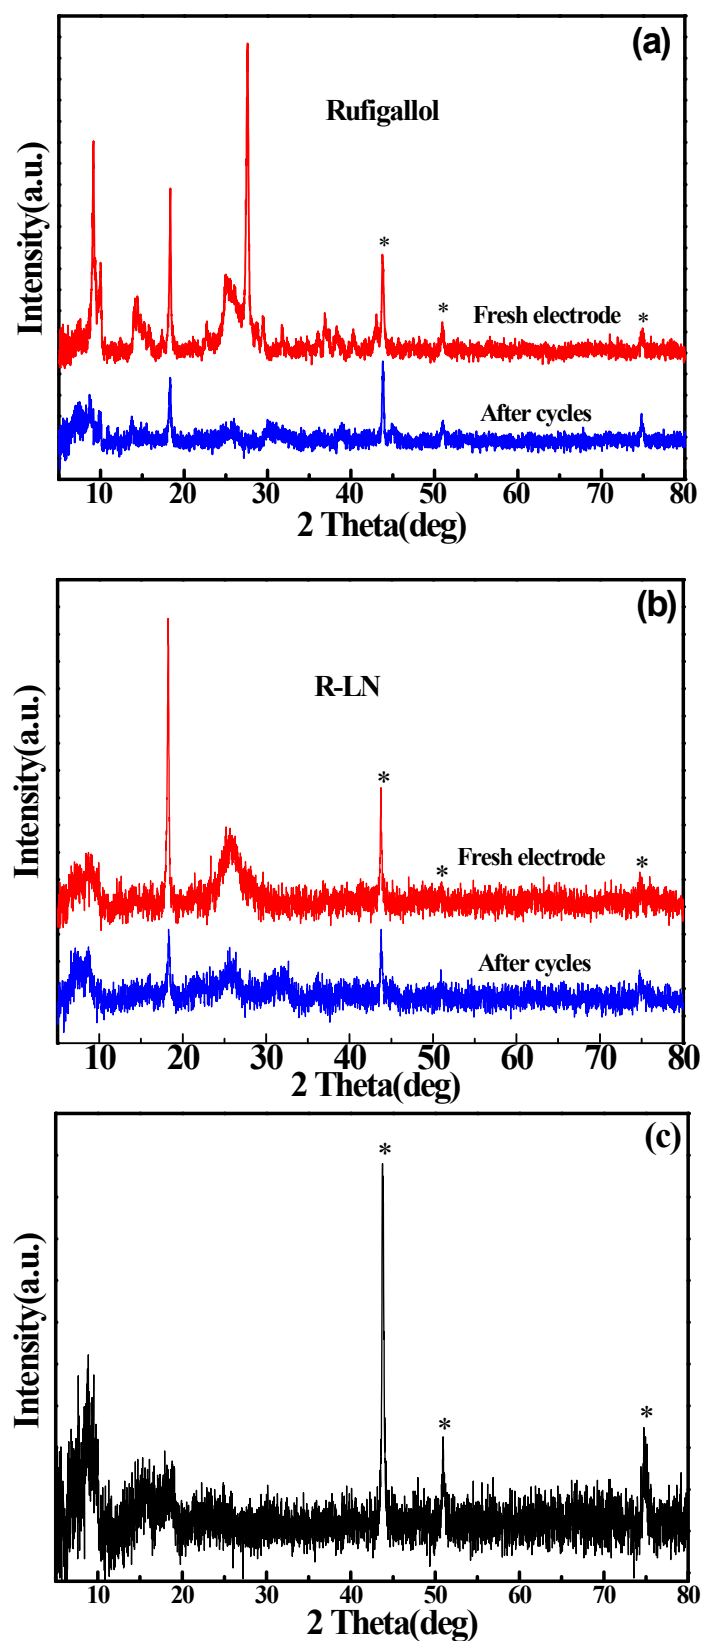

Figure S2. XRD patterns of fresh electrode and the retrieved electrode after 200 cycles at 500 mA  $g^{-1}$  of rufigallol (a) and R-LN (b). There are three typical peaks at 43.8°, 50.9° and 74.8°, corresponding to the stainless steel mesh current collector (shown in c).

**\*References:**

- 1 R.R. Zhao, Y.L. Cao, X.P. Ai and H.X. Yang, *J. Electroanal. Chem.*, 2013, 688, 93.
- 2 J. Xue, C. Fan, Q.J. Deng, M.J. Zhao, L.P. Wang, A.J. Zhou and J.Z. Li, *Electrochim. Acta*, 2016, 219, 418.
- 3 L.P. Wang, J. Zou, S.L. Chen, J.Y. Yang, F.Z. Qing, P.Gao and J.Z. Li, *Electrochim. Acta*, 2017, 235, 304.
- 4 Y. Wang, Q.T. Qu, G. Liu V.S. Battaglia and H.H. Zheng, *Nano Energy*, 2017, 39, 200.
- 5 K. Saravanan, M. Nagarathinam, P. Balaya and J.J. Vittal, *J. Mater. Chem.*, 2010, 20, 8329.
- 6 X.Y. Han, F. Yi, T.L. Sun and J.T. Sun, *Electrochem. Commun.*, 2012, 25, 136.
- 7 M. Veerababu, U.V. Varadaraju and R. Kothandaraman, *Int. J. Hydrogen Energy*, 2015,40, 14925.

8
